# Supplementary material for: Establishment of a free-mating, long-standing and highly productive laboratory colony of Anopheles darlingi from the Peruvian Amazon
Source: Springer Nature journal article supplement (doi:10.1186/s12936-015-0733-0), 2015-05-29

## A) Immature rearing room

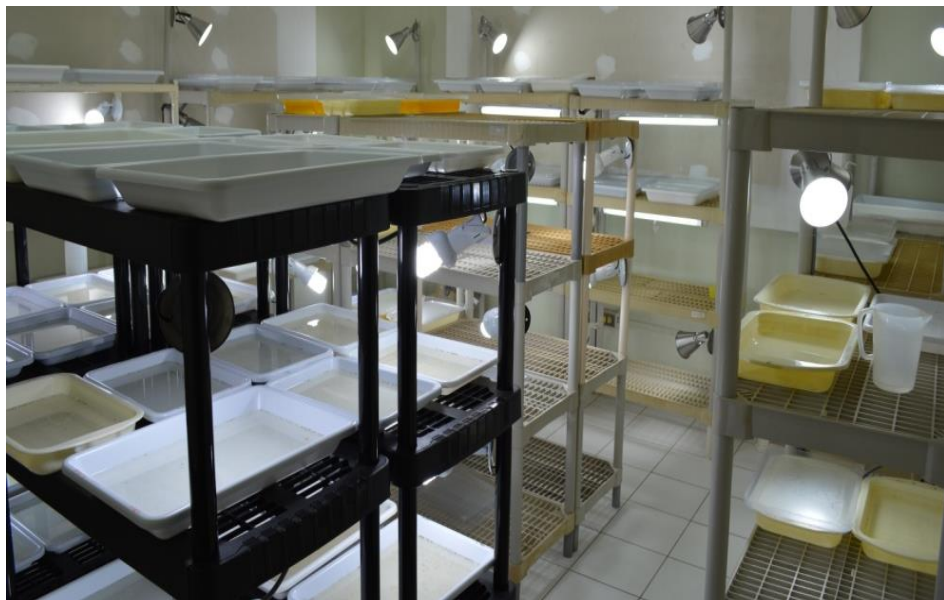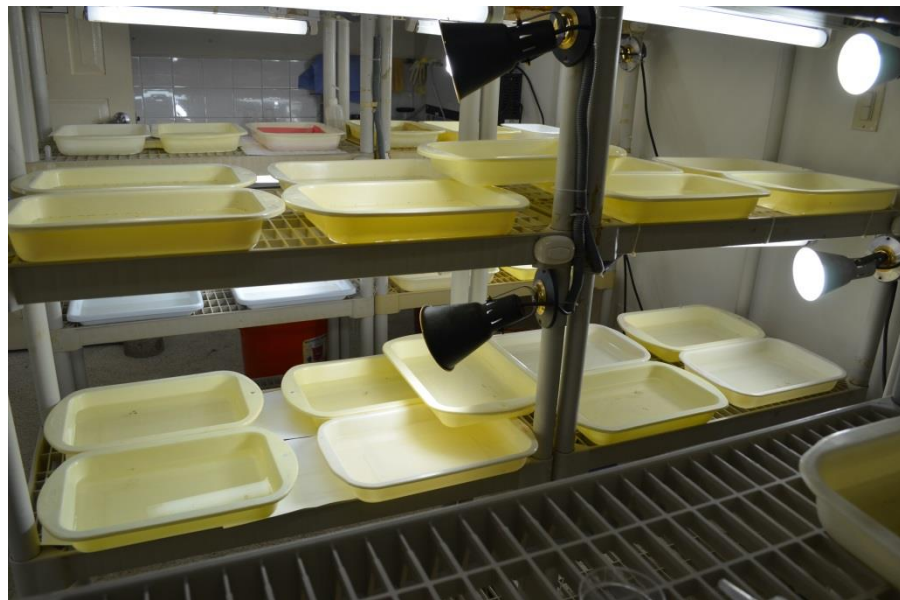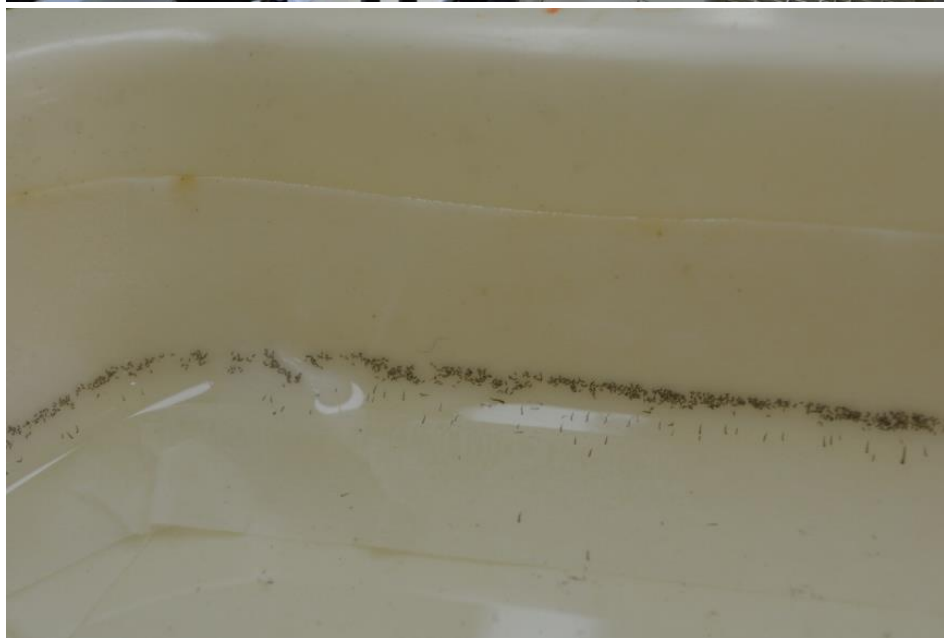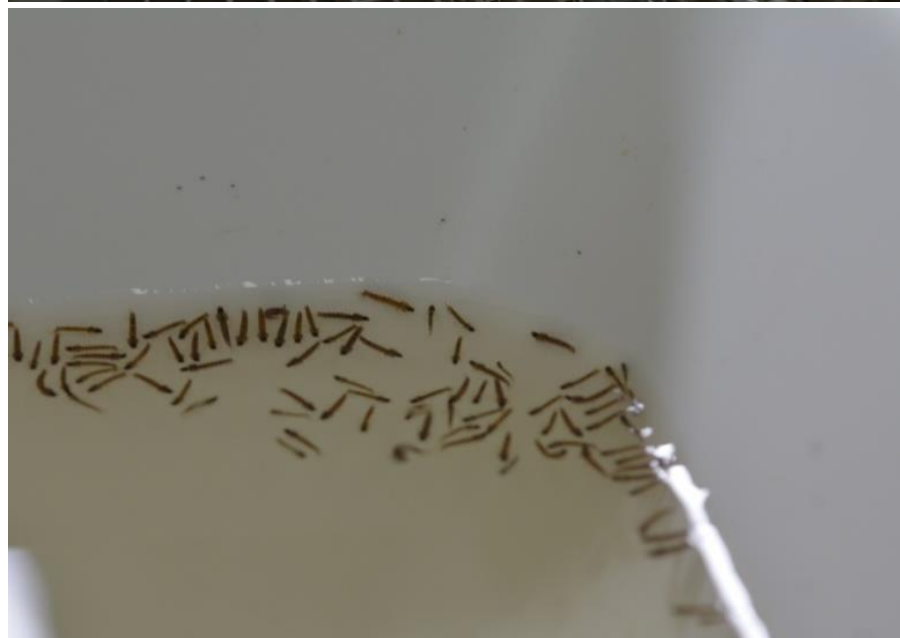

## B) Adult rearing room

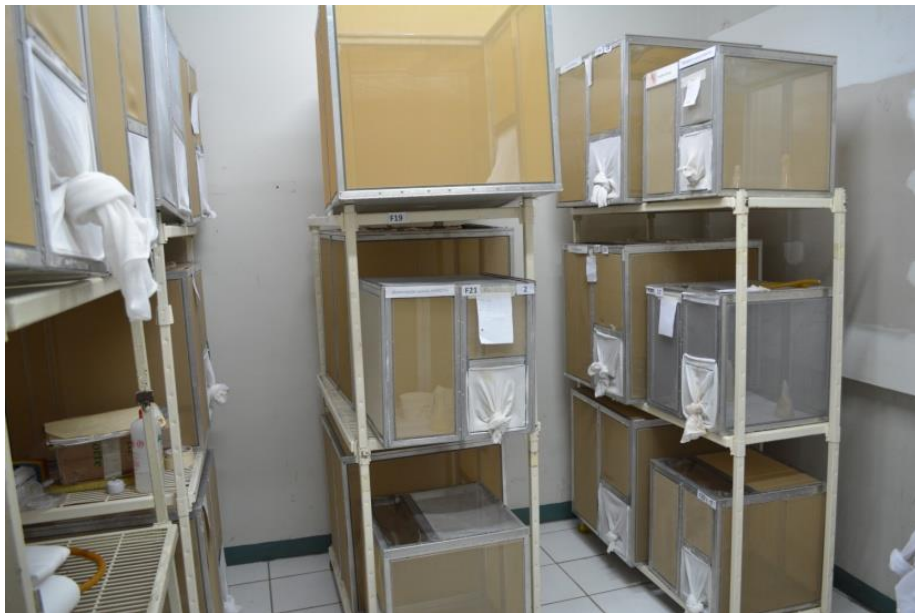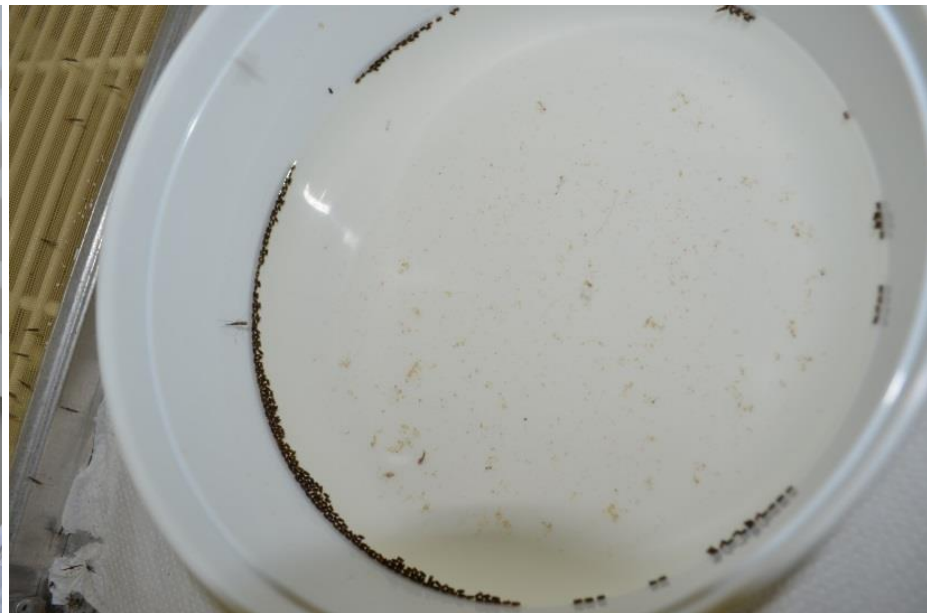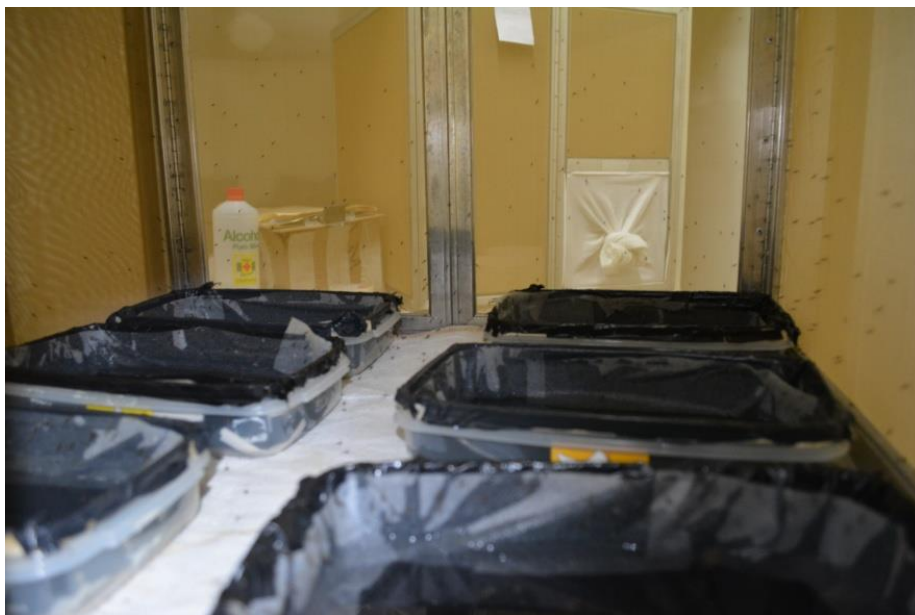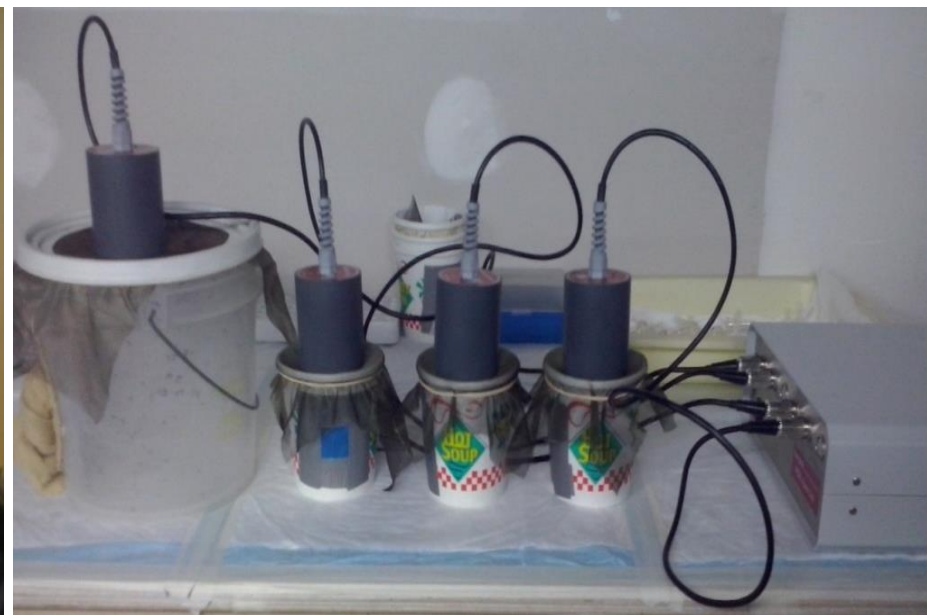

Supplement: MOESM2 [file 9761344]
