# Supplementary material for: Establishment of a free-mating, long-standing and highly productive laboratory colony of Anopheles darlingi from the Peruvian Amazon
Source: Springer Nature journal article supplement (doi:10.1186/s12936-015-0733-0), 2015-05-29

5-8 days

ADULT

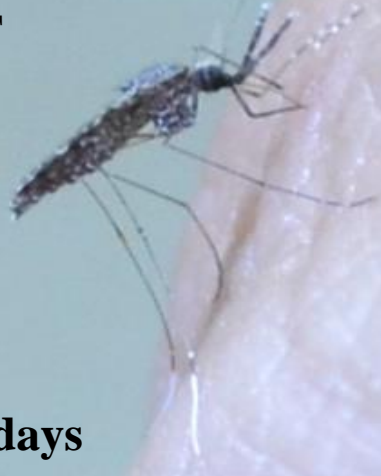

Female blood-feeding

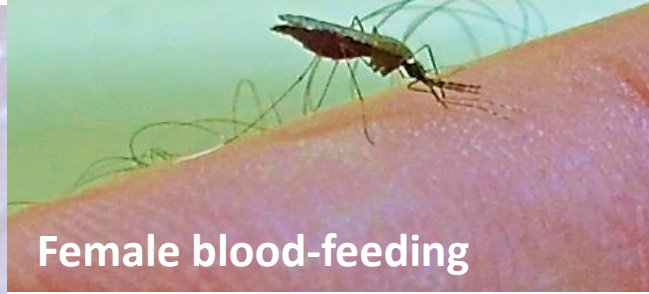

4 days

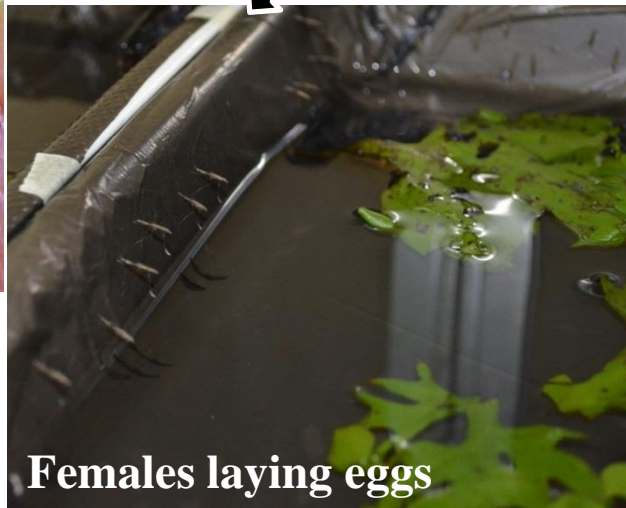

Females laying eggs

2 days

PUPA

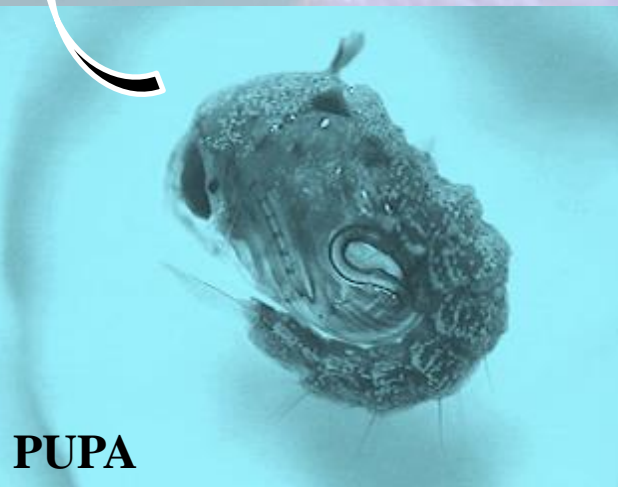

*Anopheles darlingi*  
egg to adult  
development

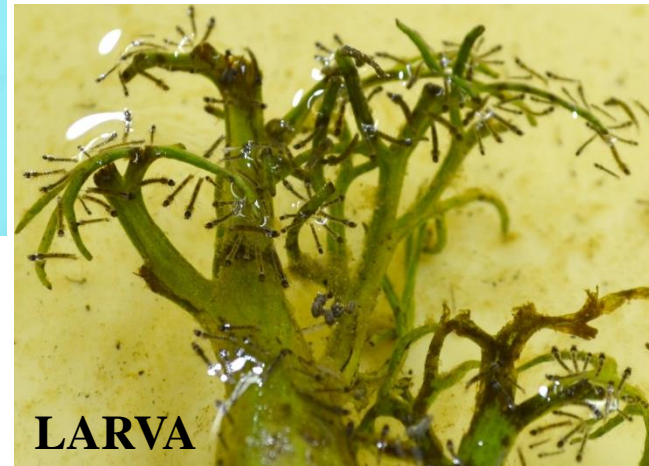

LARVA

6-16 days

2 days

EGG

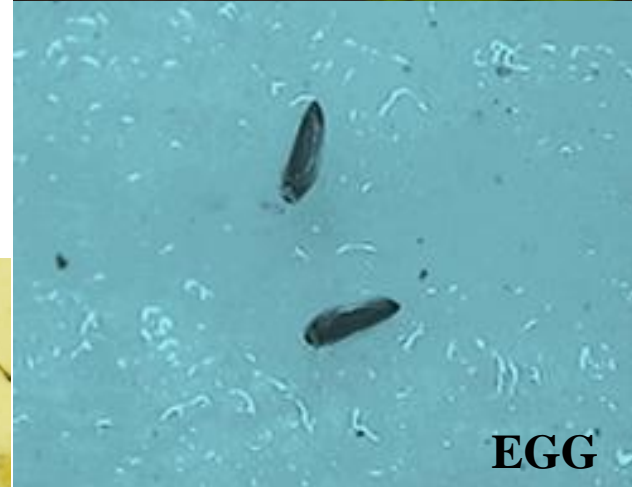

Supplement: MOESM3 [file 9761344]
